## Further characterization of the combining sites of *Bandeiraea (Griffonia) simplicifolia* lectin-I, isolectin A<sub>4</sub>

Albert M. Wu<sup>1</sup>, June H. Wu<sup>2</sup>, Yuen-Yuen Chen,  
Shuh-Chyung Song and E.A. Kabat<sup>3</sup>

Glyco-Immunochemistry Research Lab, Institute of Molecular and Cellular Biology, <sup>2</sup>Department of Microbiology and Immunology, College of Medicine, Chang-Gung University, Kwei-san, Tao-yuan, 333, Taiwan, and <sup>3</sup>Department of Microbiology, Human Genetics and Development and Neurology, and Cancer Center/Institute for Cancer Research, Columbia University, College of Physicians and Surgeons, New York, NY 10032, USA

Received on May 14, 1998; revised on March 8, 1999; accepted on May 11, 1999

***Bandeiraea (Griffonia) simplicifolia* lectin-I, isolectin A<sub>4</sub> (GS I-A<sub>4</sub>), which is cytotoxic to the human colon cancer cell lines, is one of two lectin families derived from its seed extract. It contains only a homo-oligomer of subunit A, and is most specific for GalNAcα1→. In order to elucidate the GS I-A<sub>4</sub>-glycoconjugate interactions in greater detail, the combining site of this lectin was further characterized by enzyme linked lectino-sorbent assay (ELLSA) and by inhibition of lectin-glycoprotein interactions. This study has demonstrated that the Tn-containing glycoproteins tested, consisting of mammalian salivary glycoproteins (armadillo, asialo-hamster sublingual, asialo-ovine, -bovine, and -porcine submandibular), are bound strongly by GS I-A<sub>4</sub>. Among monovalent inhibitors so far tested, p-NO<sub>2</sub>-phenylα-GalNAc is the most potent, suggesting that hydrophobic forces are important in the interaction of this lectin. GS I-A<sub>4</sub> is able to accommodate the monosaccharide GalNAc at the nonreducing end of oligosaccharides. This suggests that the combining site of the lectin is a shallow cavity. Among oligosaccharides and monosaccharides tested as inhibitors of the binding of GS I-A<sub>4</sub>, the hierarchy of potencies are: GalNAcα1→3GalNAcβ1→3Galα1→4Galβ1→4Glc (Forssman pentasaccharide) > GalNAcα1→3(LFucα1→2)Gal (blood group A) > GalNAc > Galα1→4Gal > Galα1→3Gal (blood group B-like) > Gal.**

**Key words:** carbohydrate specificities/*Bandeiraea (Griffonia) simplicifolia* lectin-I isolectin A<sub>4</sub>, (GS I-A<sub>4</sub>)/glycoprotein binding/lectins

### Introduction

*Bandeiraea (Griffonia) simplicifolia* lectin-I (GS I) is one of two lectin families that is extracted from the seeds of *Bandeiraea*

(*Griffonia) simplicifolia* (GS) (Mäkelä, 1957). It agglutinates human blood group A and B cells and is specific for GalNAcα1→ and Galα1→ at different strengths (Hayes and Goldstein, 1974). The GS I family is a glycoprotein of MW 114,000 consisting of four subunits (Hayes and Goldstein, 1974). This family is composed of five tetrameric isolectins with different binding specificities, which result from the combination of two different glycoprotein (A and B) subunits (A<sub>4</sub>, A<sub>3</sub>B, A<sub>2</sub>B<sub>2</sub>, AB<sub>3</sub>, and B<sub>4</sub>) (Murphy and Goldstein, 1977). GS I-A<sub>4</sub> contains only A subunits, and is specific for GalNAc, but also reacts with Galα1→ containing glycoproteins (Wood *et al.*, 1979). This lectin is cytotoxic to the human colon cancer cell lines LS174t and SW1116 (Chen *et al.*, 1994) and has affinity for almost all human ovarian cyst blood group A active glycoproteins (Wood, 1979; Wu *et al.*, 1996). However, our knowledge related to the binding profiles of GS I-A<sub>4</sub> to mammalian structural units (Wu and Sugii, 1988, 1991; Wu *et al.*, 1992a, 1996; Chen *et al.*, 1998) is very limited, especially the relative reactivities of I-A<sub>4</sub> to Forssman and Tn related ligands. In order to understand better the biological roles of GS I-A<sub>4</sub> and for it to be useful as an investigative tool for biochemical and immunochemical studies, it is important to establish its fine binding properties. In the present communication, we characterized the combining sites of GS I-A<sub>4</sub> by enzyme linked lectino-sorbent assay (ELLSA) and by inhibition of lectin binding by ELLSA, using glycoconjugates that have been used in our laboratory to group lectins for over a decade (Wu and Sugii, 1988; Wu *et al.*, 1992a, 1997a,b; Chen *et al.*, 1998). The results showed that GS I-A<sub>4</sub> has strong affinity for GalNAc located at both the Tn determinant and at nonreducing ends (as Forssman pentasaccharide, GalNAcα1→3GalNAcβ1→3Galα1→4Galβ1→4Glc and human blood group A active trisaccharide, GalNAcα1→3[LFucα1→2]Gal).

### Results

#### *GS I-A<sub>4</sub>* glycoform interaction

The interaction patterns of GS I-A<sub>4</sub> with glycoproteins, as studied by a microtiter plate lectin-enzyme binding assay (ELLSA), are shown in Figure 1 and its binding profile for glycoproteins is illustrated in Table I. The binding data are expressed as ng glycoprotein required for binding at 1.5 A<sub>405</sub> and as maximum A<sub>405</sub> absorbance after 2 h incubation. Among 18 glycoproteins tested, GS I-A<sub>4</sub> reacted best with the mammalian salivary Tn (GalNAcα1→Ser/Thr) containing glycoproteins. These include armadillo submandibular Tn glycoprotein (native ASG-Tn, Figure 1b), asialo hamster sublingual mucin

<sup>1</sup>To whom correspondence should be addressed

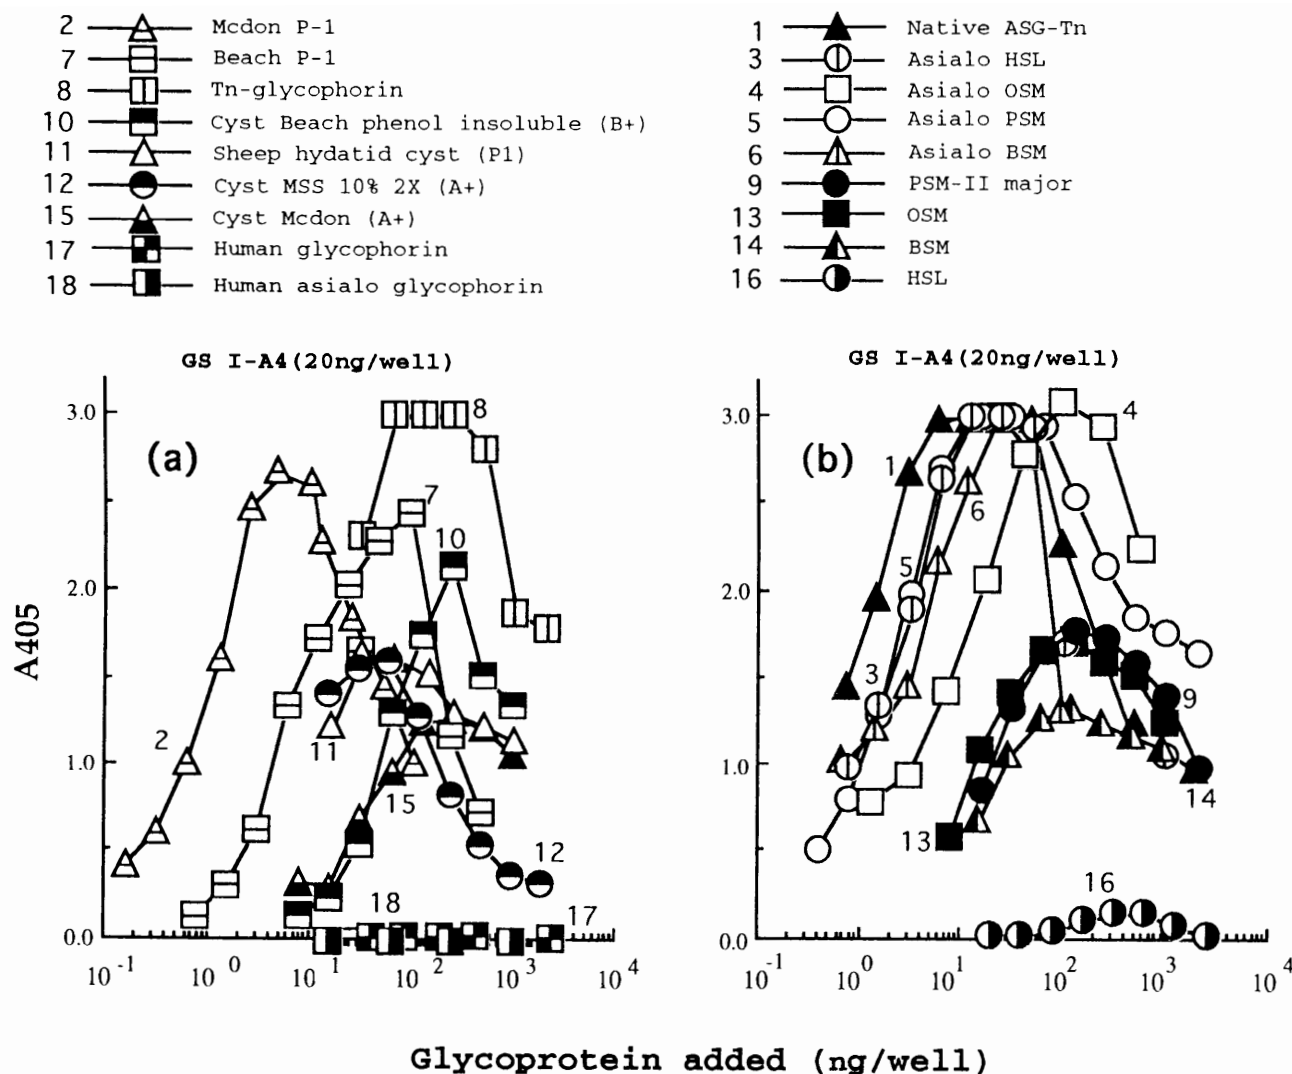

**Fig. 1.** Binding of GS I-A<sub>4</sub> to microtiter plates coated with serially diluted glycoproteins. The lectin (GS I-A<sub>4</sub>) was used at a constant amount of 20 ng/well. Total volume 50  $\mu$ l. A<sub>405</sub> was read at 2 h.

(asialo HSL, Figure 1b), asialo ovine (asialo OSM, Figure 1b), bovine (asialo BSM, Figure 1b), porcine (asialo PSM, Figure 1b) submandibular glycoproteins, and a human blood group ABO precursor equivalent glycoprotein from human ovarian cyst fluid (Mcdon P-1, Figure 1a), in which less than 3.1 ng of the glycoproteins coated was required to interact with 20 ng of lectin to yield a A<sub>405</sub> of 1.5 within 2 h. Although the percentage of absorbance of the glycoproteins in the microtiter plate assay has not been established, the amount of glycoprotein required to give 1.5 (A<sub>405</sub>) units with this lectin has to be equal to or less than 3.1 ng. This lectin also bound to a human blood group P<sub>1</sub> active glycoprotein purified from sheep hydatid cyst fluid (Figure 1a), human blood group A or B active glycoproteins (cyst MSS, cyst Mcdon, and cyst Beach phenol insoluble in Figure 1a and Table I), human Tn glycophorin (Figure 1a), sialylated Tn containing gps (PSM-major and OSM-major; Figure 1b) and other blood group precursor equivalent gp (Beach P-1, Figure 1a), but was inactive with both native and asialo human glycophorin and hamster sublingual glycoprotein.

#### *Inhibition of GS I-A<sub>4</sub>-glycoform interaction by various glycoproteins*

The ability of various glycoproteins to inhibit the binding of GS I-A<sub>4</sub> with asialo ovine salivary glycoprotein by ELLSA was also analyzed. The amounts of glycoprotein (nanogram) required for 50% inhibition are shown in Figure 2 and Table II.

Among the glycoproteins tested for inhibition of interaction, Mcdon P-1, a mild acid hydrolyzed glycoprotein (cyst Mcdon) prepared from human ovarian cyst fluid (curve 1 in Figure 2a) (Wu and Sugii, 1988), asialo-OSM, -BSM, and -PSM (curves 2, 3 and 3 in Figure 2b), ASG-Tn (curve 4 in Figure 2a) and asialo HSL (curve 5 in Figure 2b) were the best which required less than 3.1 ng to inhibit 50% of the interaction. All of these Tn glycoproteins were more than ten times more active than their native or sialylated compounds. The decreasing order of the reactivities of these glycoforms is Mcdon P-1 (precursor equivalent glycoprotein, curve 1), salivary Tn-glycoproteins (curves 2–5)  $\geq$  human blood group P<sub>1</sub> active gp (sheep hydatid cyst gp, curve 6) > cyst MSS 10% 2 $\times$  (a human blood group A active gp,

**Table I.** Binding of GS I-A<sub>4</sub> lectin to human blood group A, B, H, and P<sub>1</sub> active glycoproteins(gps), sialo- and asialo glycoproteins analyzed by ELLSA<sup>a</sup>

| Curve no. | a,b in Fig. 1 | Glycoprotein <sup>b</sup>                    | 1.5 (A <sub>405</sub> ) unit (ng) | Max. A <sub>405</sub> absorbance |                        |
|-----------|---------------|----------------------------------------------|-----------------------------------|----------------------------------|------------------------|
|           |               |                                              |                                   | Reading                          | Intensity <sup>c</sup> |
| 1         | b             | Native ASG-Tn ( <b>Tn</b> )                  | 0.8                               | 3.0                              | +++++                  |
| 2         | a             | Mcdon P-1 ( <b>Tn,T,I,II</b> )               | 1.1                               | 2.6                              | +++++                  |
| 3         | b             | Asialo HSL ( <b>Tn</b> )                     | 2.0                               | 3.0                              | +++++                  |
| 4         | b             | Asialo OSM ( <b>Tn</b> )                     | 2.0                               | 3.0                              | +++++                  |
| 5         | b             | Asialo PSM ( <b>Tn,A,Ah,T</b> )              | 2.0                               | 3.0                              | +++++                  |
| 6         | b             | Asialo BSM ( <b>Tn</b> )                     | 3.1                               | 3.0                              | +++++                  |
| 7         | a             | Beach P-1 ( <b>Tn,T,I,II</b> )               | 9.5                               | 3.0                              | +++++                  |
| 8         | a             | Tn-glycophorin ( <b>Tn</b> )                 | 18.0                              | 3.0                              | +++++                  |
| 9         | b             | PSM (sialyl <b>Tn,A,Ah,T</b> )               | 19.5                              | 1.76                             | +++                    |
| 10        | a             | Cyst beach phenol insoluble ( <b>B</b> )     | 20.0                              | 2.1                              | ++++                   |
| 11        | a             | Sheep hydatid cyst gp ( <b>E</b> [P1])       | 26.0                              | 1.70                             | +++                    |
| 12        | a             | Cyst MSS 10% 2× ( <b>A<sub>h</sub></b> [A1]) | 28.0                              | 1.57                             | +++                    |
| 13        | b             | OSM ( sialyl <b>Tn</b> )                     | 40.0                              | 1.71                             | +++                    |
| 14        | b             | BSM (sialyl <b>Tn</b> )                      | —                                 | 1.31                             | ++                     |
| 15        | a             | Cyst Mcdon ( <b>A<sub>h</sub></b> )          | —                                 | 1.24                             | ++                     |
| 16        | b             | HSL (Sialyl <b>Tn</b> )                      | —                                 | 0.15                             | —                      |
| 17        | a             | Human glycophorin (Sialyl <b>T</b> )         | —                                 | 0                                | —                      |
| 18        | a             | Human asialo glycophorin ( <b>T</b> )        | —                                 | 0                                | —                      |

<sup>a</sup>20 ng of biotinylated GS I-A<sub>4</sub> was added to various concentrations of glycoprotein ranging from 0.031 ng to 10 μg.

<sup>b</sup>Lectin determinants in parentheses; blood group specificity in brackets. The symbols in parentheses indicate the human blood group activity and/or lectin determinants (Wu and Sugii, 1988, 1991; Wu *et al.*, 1997a) are expressed in bold: **F**, GalNAcα1→3GalNAc; **A**, GalNAcα1→3Gal; **A<sub>h</sub>**, GalNAcα1→3[LFucα1→2]Gal; **B**, Galα1→3Gal; **E**, Galα1→4Gal; **T**, Galβ1→3GalNAc; **Tn**, GalNAcα1→Ser/Thr; **I,II**, Galβ1→3/4GlcNAc.

<sup>c</sup>The results were recorded according to the spectrophotometric absorbance value at 405 nm (i.e., A<sub>405</sub>) after two hrs incubation and expressed by both ng glycoproteins required at 1.5 A<sub>405</sub> and maximum A<sub>405</sub> absorbance as follows: +++++ (O.D. ≥ 2.5), ++++ (O.D.: 2.5–2.0), +++ (O.D.: 2.0–1.5), ++ (O.D.: 1.5–0.75), + (O.D.: 0.75–0.2), and - (O.D.: < 0.2).

curve 7) > sialylated **Tn** glycoproteins (BSM and PSM, curve 8); precursor equivalent gp (cyst Beach P-1, curve 9) > human **Tn** glycophorin and OSM (curves 10 and 11) >> cyst Mcdon and HSL (blood group **A<sup>+</sup>** and sialylated **Tn** gp from sublingual gland, (curves 12 and 13) >> cyst Beach phenol insoluble (**B<sup>+</sup>**) and **Tn** glycopeptide mixture (curves 14 and 15).

#### *Inhibition of GS I-A<sub>4</sub>-glycoform interaction by mono- and oligosaccharides*

The ability of various sugar inhibitors to inhibit the binding of GS I-A<sub>4</sub> with asialo ovine salivary glycoprotein by ELLSA is shown in Figure 3 and the nanomoles of ligands required for 50% inhibition of the lectin–glycan interaction are shown in Table III.

Among the monosaccharides and oligosaccharides studied, p-NO<sub>2</sub>-phenyl αGalNAc (curve 1 in Figure 3) was the best inhibitor, and 7.7 times more active than the Forssman pentasaccharide (**F<sub>p</sub>**, GalNAcα1→3GalNAcβ1→3Galα1→4Galβ1→4Glc; curve 2 in Figure 3b). It was 15.3 and 115.4 times more active than its β anomer (curve 6) and Gal (curve 14 in Figure 3), respectively, while p-NO<sub>2</sub>-phenyl-β-GalNAc and GalNAc were equally active. p-NO<sub>2</sub>-phenyl derivatives of Gal were about four times more active than the corresponding methyl derivatives (curve 3, 8, 13, and 16 in Figure 3a). Meli-

biose (Galα1→6Glc, curve 7) was slightly less active than GalNAc and about 4.2 times more active than Gal (curve 14), and two times more active than raffinose (Galα1→6Glcβ1→2DFru, curve 11) and stachyose (Galα1→6Galα1→6Glcβ1→2DFru, curve 12).

Among the mammalian oligosaccharides tested for inhibition of interaction, the Forssman pentasaccharide (**F<sub>p</sub>**, GalNAcα1→3GalNAcβ1→3Galα1→4Galβ1→4Glc, curve 2 in Figure 3b) was the best—it was 1.7 and 2.0 times more active than the human blood group A trisaccharide (GalNAcα1→3[LFucα1→2]Gal, **A<sub>h</sub>**, curve 4 in Figure 3b) and GalNAc (curve 5), respectively, while GalNAc (curve 5) was 2.0 and 3.8 times more active than Galα1→4Gal (**E**, curve 9) and Galα1→3Gal (**B**, curve 10), respectively. Gal (curve 14), which was 7.5 times less active than GalNAc, was 2 and 3 times more active than Galβ1→3GlcNAc (**I**, curve 15) and Galβ1→3GalNAc (**T**, curve 17), respectively, while Galβ1→4Glc (**L**, curve 18), Galβ1→4GlcNAc (**II**) and Glc were poor inhibitors or inactive.

#### **Discussion**

Previous studies on the combining sites of *Bandeiraea (Griffonia) simplicifolia* lectin-I, isolectin A<sub>4</sub>, (GS I-A<sub>4</sub>) indicated that

**Table II.** Amount of various glycoproteins and Tn containing glycopeptide giving 50% inhibition of binding of GSI-A<sub>4</sub> (20 ng/50μl) by asialo OSM (10 ng/50μl)<sup>a</sup>

| Curve | a,b in Fig. 3 | Inhibitor                     | Lectin determinants <sup>c</sup>    | Quant. giving 50% inhib.(ng) | Rel. potency |
|-------|---------------|-------------------------------|-------------------------------------|------------------------------|--------------|
| 1     | a             | Mcdon P-1                     | <b>Tn,T,I,II</b>                    | 1.5                          | 1.00         |
| 2     | b             | Asialo OSM                    | <b>Tn</b>                           | 1.6                          | 1.07         |
| 3     | b             | Asialo BSM                    | <b>Tn</b>                           | 1.7                          | 1.13         |
| 3     | b             | Asialo PSM                    | <b>Tn,A,A<sub>h</sub>,T</b>         | 1.7                          | 1.13         |
| 4     | a             | Native ASG-Tn                 | <b>Tn</b>                           | 2.0                          | 1.33         |
| 5     | b             | Asialo HSL                    | <b>Tn</b>                           | 3.1                          | 2.07         |
| 6     | a             | Sheep hydatid cyst gp         | <b>E[P<sub>1</sub>]</b>             | 5.5                          | 3.67         |
| 7     | a             | Cyst MSS 10% 2×               | <b>A<sub>h</sub>[A<sub>1</sub>]</b> | 10.0                         | 6.67         |
| 8     | b             | BSM                           | Sialyl <b>Tn</b>                    | 20.0                         | 13.33        |
| 8     | b             | PSM                           | Sialyl <b>Tn,A,A<sub>h</sub>,T</b>  | 20.0                         | 13.33        |
| 9     | a             | Beach P-1                     | <b>Tn,T,I,II</b>                    | 28.0                         | 18.67        |
| 10    | a             | Tn-glycophorin                | <b>Tn</b>                           | 38.0                         | 25.33        |
| 11    | b             | OSM                           | Sialyl <b>Tn</b>                    | 40.0                         | 26.67        |
| 12    | a             | Cyst Mcdon                    | <b>A<sub>h</sub></b>                | 130.0                        | 86.67        |
| 13    | b             | HSL                           | Sialyl <b>Tn</b>                    | 150.0                        | 100.00       |
| 14    | b             | Cyst Beach phenol insoluble   | <b>B<sup>+</sup></b>                | 690.0                        | 460.00       |
| 15    | b             | Tn glycopeptides (Tn mixture) | <b>Tn</b>                           | 690.0                        | 460.00       |
| 16    | a             | Human glycophorin             | Sialyl <b>T</b>                     | 277.8<br>(6% inhibition)     |              |
| 17    | a             | Human asialo glycophorin      | <b>T</b>                            | 277.8<br>(5% inhibition)     |              |

<sup>a</sup>The inhibitory activity was estimated from the inhibition curve in **Figure 2** and is expressed as the amount (ng) of inhibitor giving 50% inhibition of the control lectin binding. Total volume 50μl.

<sup>b</sup>Relative potency of glycoproteins when Mcdon P-1 was taken as 1.0.

<sup>c</sup>Blood group specificity.

GS I-A<sub>4</sub> has affinity for **A**(GalNAcα1→3Gal), **Tn**(GalNAcα1→Ser/Thr) > **B**(Galα1→3Gal), and **E**(Galα1→4Gal) (Wood, 1979; Wu *et al.*, 1996). In this report, we further studied the binding reactivity of GS I-A<sub>4</sub> using our recently established ELLSA method, in which the lectin was biotinylated and binding was detected with alkaline phosphatase-conjugated avidin (Duk *et al.*, 1994; Lisowska *et al.*, 1996). Since it is difficult to quantitate the amounts of the glycoproteins absorbed onto the microwells, the interactions of GS I-A<sub>4</sub> with various glycoproteins were examined by three parameters: (1) Amounts of the glycoproteins added to wells that gave 1.5 (A<sub>405</sub>) (Table I) units; (2) The maximum O.D. for each glycoprotein after 2 h of incubation (Table I); (3) The amount of the glycoproteins required to give 50% inhibition (Table II). The structures of the sugar chains of the mucins tested have not all been established. Certain conclusions can nevertheless be made.

When the interactions of three parameters of GS I-A<sub>4</sub> were compared (Figure 4), it is clearly shown that these salivary **Tn** containing glycoproteins containing clusters of **Tn** residues are most strongly bound by GS I-A<sub>4</sub>. Mcdon P-1, which is the nondialyzable fraction of a human blood group A active glyco-

protein prepared from ovarian cyst fluid (cyst Mcdon, Figure 1a and curve 1 in Figure 2) after mild acid hydrolysis, is also among the those most strongly bound ones. Thus, it can be assumed that the high reactivity of this glycoprotein is due to the exposure of a large number of **Tn** structures following mild acid hydrolysis.

Based on the data of the three parameters, variation of different reactivities were found in some glycoproteins. Human blood group **A** (cyst MSS and cyst Mcdon), **B** (cyst Beach) and **P<sub>1</sub>** (sheep hydatid gp) active glycoproteins, and sialylated gps (BSM, PSM, OSM, and HSL) showed relatively poor binding (Figure 4a,b), but were active in the inhibition assay (Figure 4a). This can be explained by different absorption (onto the micro-well) properties among glycoproteins, especially the sialylated gps.

From the results of both binding and inhibition assays, it is shown that all of the human blood group A or B active glycoproteins (curves 10, 12, and 15 in Figure 1, and curve 7, 12, and 14 in Figure 2) were less active than the mammalian **Tn** containing gps indicating that this lectin favors **Tn** clusters (curves 1–6 in Figure 1 and curves 1–5 in Figure 2).

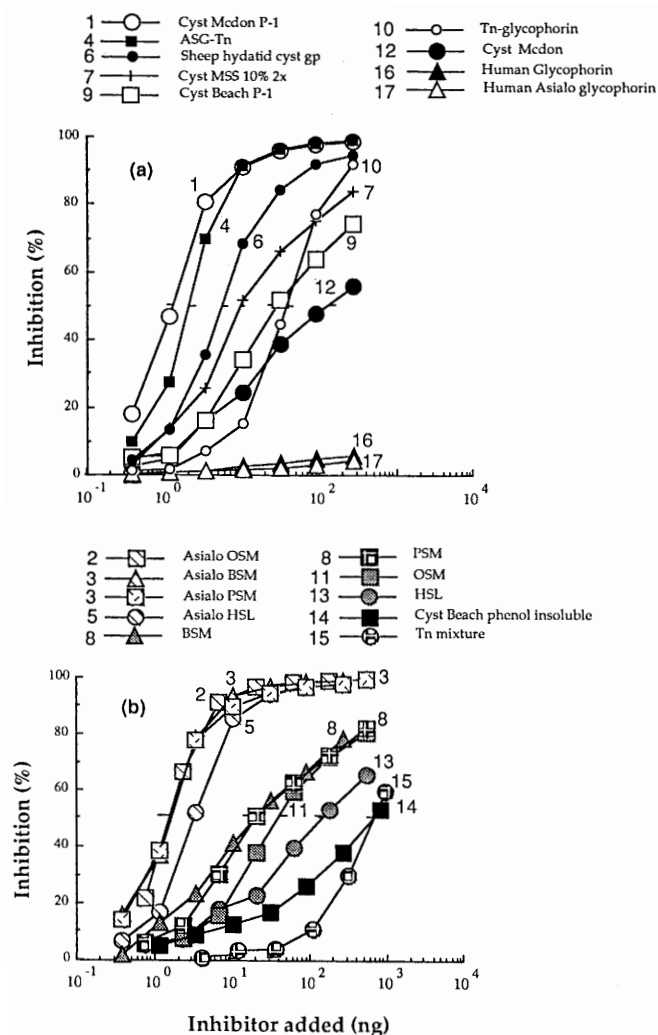

**Fig. 2.** Inhibition of GS I-A<sub>4</sub> binding to asialo OSM-coated ELLSA plates with various glycoproteins and a mixture Tn containing glycopeptides. The quantity of asialo OSM in the coating solution was 10 ng per well. The amount of lectin used for inhibition assay was 20 ng per well. Total volume: 50  $\mu$ l. A<sub>405</sub> was read at 2 h.

Although human Tn-glycophorin also reacted well with GS I-A<sub>4</sub>, its reactivity was about 12–25 times weaker than that of the other Tn-containing glycoproteins (curves 1–6 in Figure 2). This suggests that Tn-glycophorin contains fewer Tn residues (about nine residues) than those of secretory type mucins (Lisowska, 1988; Wu *et al.*, 1994a–c).

Based on the inhibition profile, Tn-glycophorin was at least seven times more active than native glycophorin and asialoglycophorin (curve 10, 15, and 16 in Figure 2) implying that the binding of Tn-glycophorin can be abolished by substitution of Gal at carbon 3 and of sialic acid at carbon 6 (Table II).

Tn glycopeptides (curve 2 and 14 in Figure 2) from asialo OSM were 430 times less active than the original molecule, showing that the size of Tn cluster is an important factor affecting binding.

From the inhibition experiments with defined oligosaccharides, the following conclusion was reached: Forssman pentasaccharide (GalNAc $\alpha$ 1 $\rightarrow$ 3GalNAc $\beta$ 1 $\rightarrow$ 3Gal $\alpha$ 1 $\rightarrow$ 4Gal $\beta$ 1 $\rightarrow$ 4Glc, Fp, curve 2 in Figure 3b), and GalNAc $\alpha$ 1 $\rightarrow$ 3[LFuc $\alpha$ 1 $\rightarrow$ 2]Gal (A<sub>p</sub>, curve 4 in

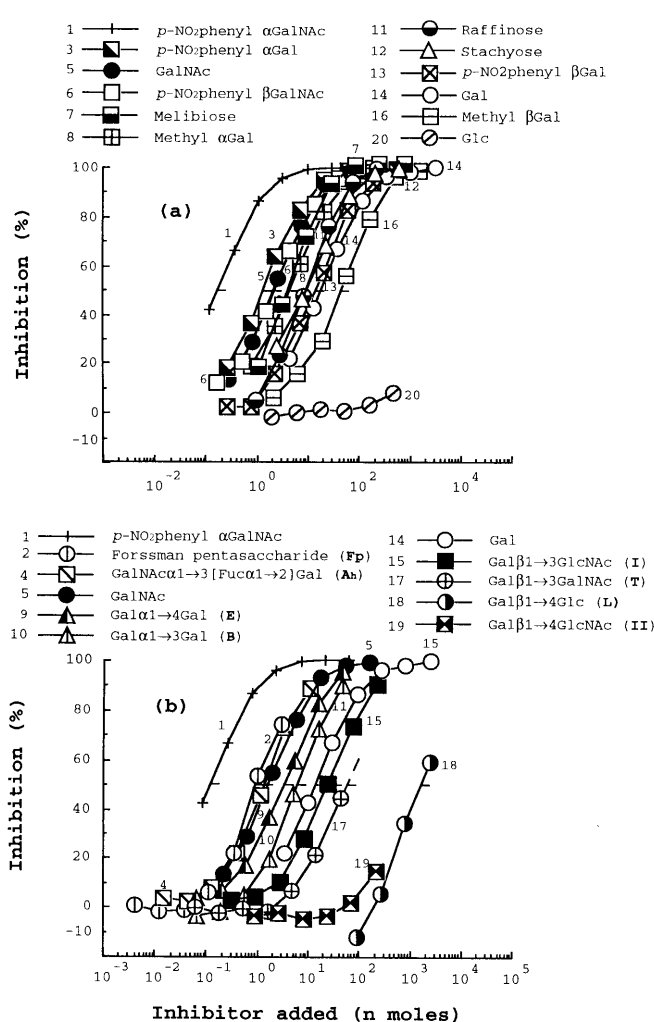

**Fig. 3.** Inhibition of GS I-A<sub>4</sub> binding to asialo OSM-coated ELLSA plates with monosaccharides, and oligosaccharides. The quantity of asialo OSM in the coating solution was 0.6 ng per well. The quantity of lectin used was 20 ng per well. Total volume: 50  $\mu$ l. A<sub>405</sub> was read at 2 h.

Figure 3b), are the most potent ligands so far identified for GS I-A<sub>4</sub>. When the inhibitory reactivities of GS I-A<sub>4</sub>-Tn glycoprotein binding by mono- and oligo-saccharide were compared, it was shown that p-NO<sub>2</sub>-phenyl  $\alpha$ GalNAc is the most potent inhibitor. Furthermore, the p-NO<sub>2</sub>-phenyl derivatives of GalNAc and Gal were more active than the corresponding methyl derivatives (curves 3, 8, 13, and 16 in Figure 3a; Wood *et al.*, 1979). Thus, it can be deduced that hydrophobic forces are important for binding (Table III). As GS I-A<sub>4</sub> is able to accommodate the monosaccharide at the nonreducing end of an oligosaccharide, the combining site of this lectin is likely to be a shallow cavity (Table III). From these and previous data (Wood *et al.*, 1979; Wu *et al.*, 1996), the binding activities of this lectin toward mammalian structural features can be ranked in decreasing order as follows: F, Fp, A > Ah > GalNAc > E > B > Gal.

The Tn determinant is the simplest carbohydrate side chain, in which GalNAc $\alpha$ 1 $\rightarrow$  is linked to the Ser/Thr of the protein core. It has been proposed as a marker for cancerous tissues

**Table III.** Amount of various saccharides giving 50% inhibition of binding of GSI-A<sub>4</sub> (20 ng/50 μl) by asialo OSM (0.6 ng/50μl)<sup>a</sup>

| Curve | a,b in Fig. 3 | Inhibitor                                               | Quant. giving 50% inhib. (nmol) | Reciprocal of rel.potency <sup>b</sup> |
|-------|---------------|---------------------------------------------------------|---------------------------------|----------------------------------------|
| 1     | a,b           | <i>p</i> -NO <sub>2</sub> phenyl αGalNAc                | 0.13                            | 115.4                                  |
| 2     | b             | GalNAcα1→3GalNAcβ1→3<br>Galα1→4Galβ1→4Glc ( <b>Fp</b> ) | 1.0                             | 15.0                                   |
| 3     | a             | <i>p</i> -NO <sub>2</sub> phenyl αGal                   | 1.0                             | 15.0                                   |
| 4     | b             | GalNAcα1→3[Fucα1→2]<br>Gal ( <b>A<sub>h</sub></b> )     | 1.7                             | 8.8                                    |
| 5     | a,b           | GalNAc                                                  | 2.0                             | 7.5                                    |
| 6     | a             | <i>p</i> -NO <sub>2</sub> phenyl βGalNAc                | 2.0                             | 7.5                                    |
| 7     | a             | Melibiose                                               | 3.6                             | 4.2                                    |
| 8     | a             | Methyl αGal                                             | 4.0                             | 3.8                                    |
| 9     | b             | Galα1→4Gal ( <b>E</b> )                                 | 4.0                             | 3.8                                    |
| 10    | b             | Galα1→3Gal ( <b>B</b> )                                 | 7.0                             | 2.1                                    |
| 11    | a             | Raffinose                                               | 7.1                             | 2.1                                    |
| 12    | a             | Stachyose                                               | 7.1                             | 2.1                                    |
| 13    | a             | <i>p</i> -NO <sub>2</sub> phenyl βGal                   | 10.0                            | 1.5                                    |
| 14    | a,b           | Gal                                                     | 15.0                            | 1.0                                    |
| 15    | b             | Galβ1→3GlcNAc ( <b>I</b> )                              | 30.0                            | 0.5                                    |
| 16    | a             | Methyl βGal                                             | 39.0                            | 0.4                                    |
| 17    | b             | Galβ1→3GalNAc ( <b>T</b> )                              | 60.0                            | 0.25                                   |
| 18    | b             | Galβ1→4Glc ( <b>L</b> )                                 | 1900.0                          | 7.9 × 10 <sup>-3</sup>                 |
| 19    | b             | Galβ1→4GlcNAc ( <b>II</b> )                             | >217.3<br>(15.0% inhibition)    |                                        |
| 20    | a             | Glc                                                     | >376.7<br>(9.0% inhibition)     |                                        |

<sup>a</sup>The inhibitory activity was estimated from the inhibition curve in **Figure 3** and is expressed as the amount of inhibitor giving 50% inhibition of the control lectin binding. Total volume 50 μl.

<sup>b</sup>Reciprocal of relative potency of sugars when Gal was taken as 1.0 (Wu *et al.*, 1992a).

(Springer, 1984; Hirohashi *et al.*, 1985; Kjeldsen *et al.*, 1988; Itzkowitz *et al.*, 1989, 1990). At the surface of the red cell membrane, the **Tn** transformation indicates an acquired disorder characterized by the exposure of normally cryptic GalNAc residues linked α→ to the hydroxyl group of Ser or Thr of membrane sialoglycoproteins (Dahr *et al.*, 1974; Cartron *et al.*, 1978). The **Tn** antigen can also be detected at the cell surface of erythrocytes, granulocytes, platelets, and B and T lymphocytes of patients presenting the **Tn** syndrome.

The Forssman antigen (GalNAcα1→3GalNAcβ1→3Gal-α1→4Galβ1→4Glcβ1→1'ceramide) is a commonly occurring heterophile antigen and it is thought that it is not present in most humans. It has been demonstrated that the Forssman antigen is found significantly in several forms of human cancer, including gastric, colon, and lung cancer (Hakomori *et al.*, 1977; Yoda *et al.*, 1980; Taniguchi *et al.*, 1981; Hakomori, 1984, 1989). This antigen is one of the tumor-associated glycolipid antigens with blood group A-like epitopes. Since the end terminal of the antigen shares a sugar residue, GalNAcα1→, with the blood group A terminal saccharide as well as Tn antigen, the unusual enhancement of activity of the blood group A-like

antigen has been strongly associated with carcinogenesis. It also indicates that an assay for this antigen in tissue sections and in circulating plasma would be of value to detect colon cancer (Ono *et al.*, 1994).

The Galα1→4Gal sequence (**E**, galabiose), which is the isomer of the blood group B active disaccharide (Galα1→3Gal), is frequently found in the carbohydrate chains of many glycosphingolipids located at the surface of mammalian cell membranes, such as intestinal and red blood cells; it is a receptor for the uropathogenic *E. coli* ligand and for toxin attachment (Bock *et al.*, 1988; Karlsson, 1989; Wu *et al.*, 1992b, 1995a). As shown in Figure 3, these two isomers were about one-fourth as active as **Fp**. However, the reactivity of the cluster form of Galα1→4Gal, as in sheep hydatid cyst gp (curve 6 in Figure 2), was more active than the blood group A active gp (curve 7 and 12). Therefore, the cluster effect of Galα1→4Gal sequence in glycoproteins may also be an important factor influencing binding. To understand the role of attachment of GS I-A<sub>4</sub> onto cancer cells, the binding of Galα1→4Gal containing glycosphingolipids has to be investigated.

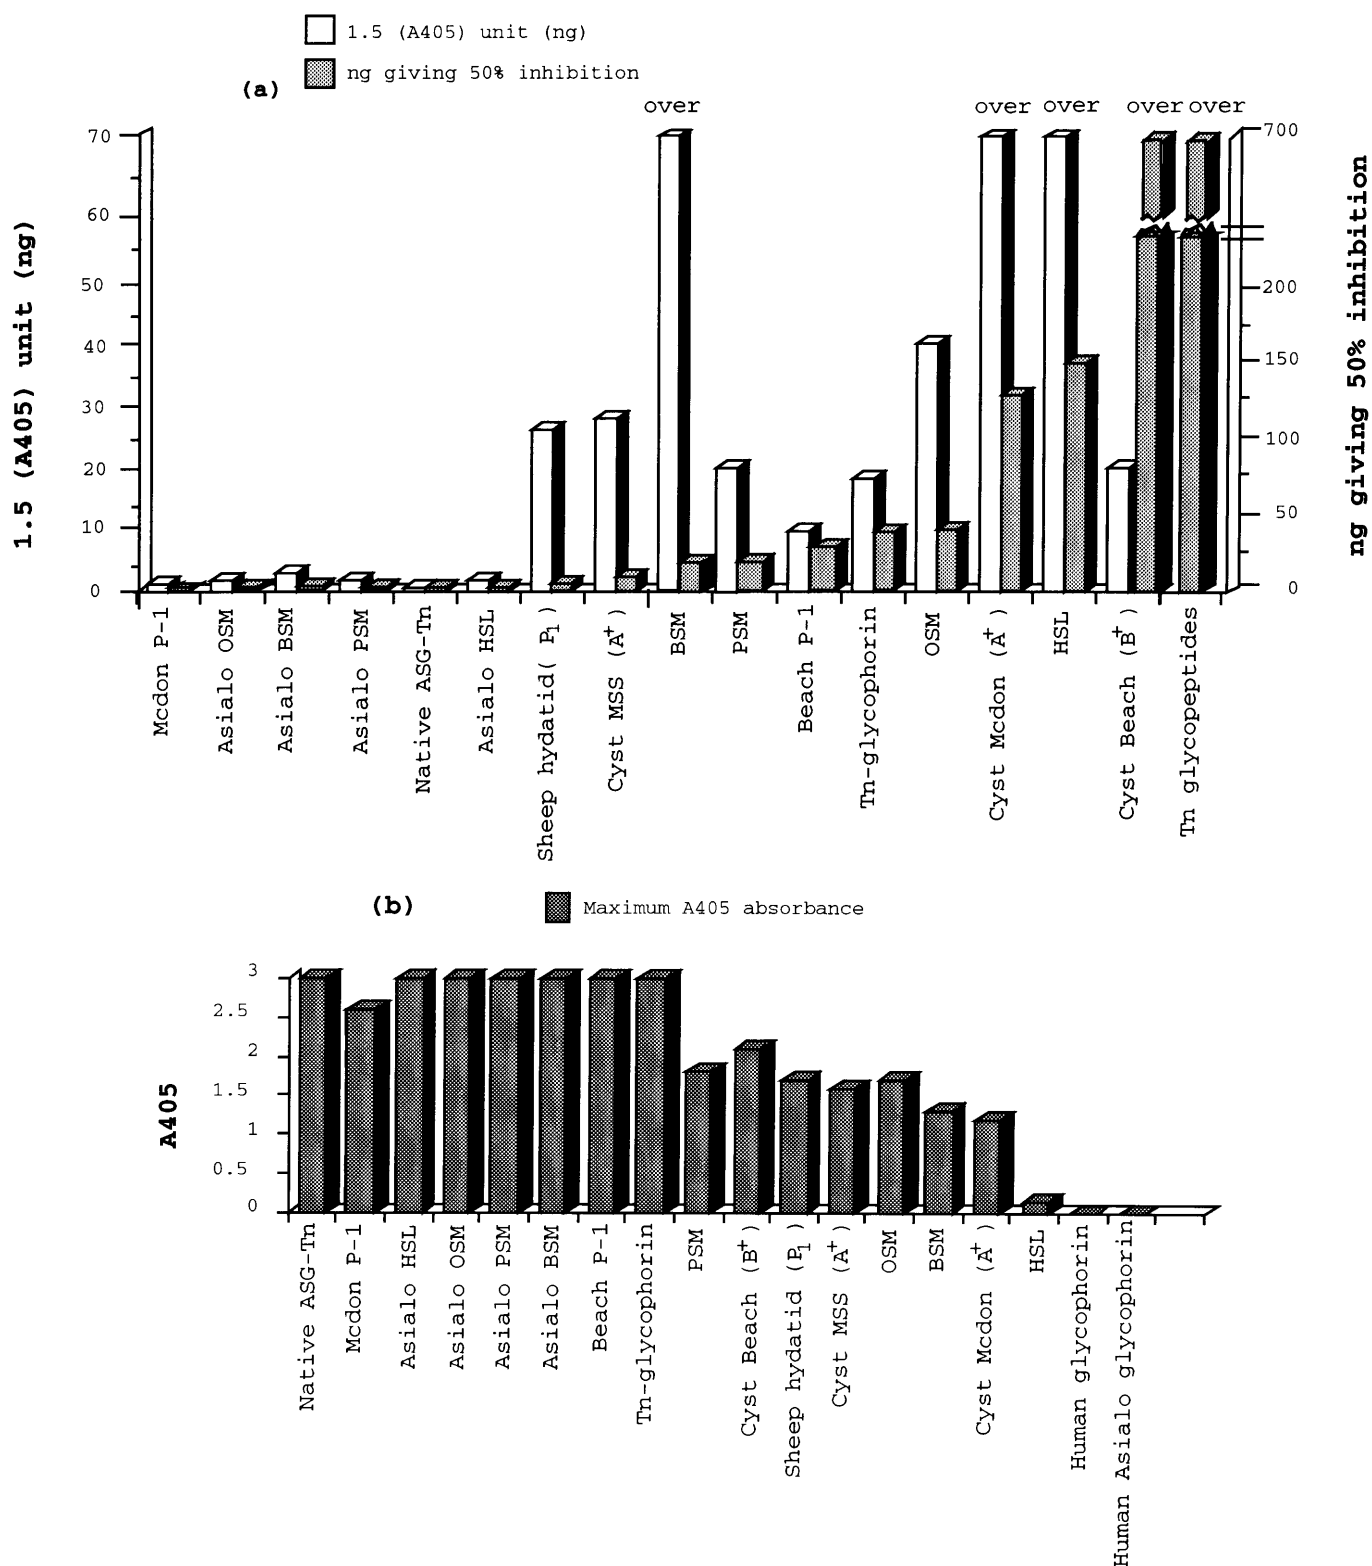

**Fig. 4.** Comparison of the binding of GS I-A<sub>4</sub> with glycoproteins. Two parameters of ng required at 1.5 unit of A<sub>405</sub> (Figure 1 and Table I) and ng required for 50% inhibition of glycoproteins (Figure 2 and Table II) are illustrated in Figure 4a, and their maximum A<sub>405</sub> in Figure 4b (Figure 1, Table I).

Most of the GalNAc $\alpha$ 1 $\rightarrow$  specific lectins bind strongly either the nonreducing end (F<sub>p</sub>, A<sub>1</sub>, and A<sub>2</sub>) (such as *Dolichos biflorus*, *Helix pomatia*, and *Wistaria floribunda* agglutinins)

or the Tn residue (such as *Vicia villosa*-B<sub>4</sub> agglutinin) of glycoconjugates (Wu and Sugii, 1988, 1991), while *Codium fragile* subspecies *tomentosoides* (CFT) and GS I-A<sub>4</sub> are lectins that

react well with both, but CFT also reacts with the Gal $\beta$ 1 $\rightarrow$ 3GalNAc $\alpha$ 1 $\rightarrow$  (**T $\alpha$** ) determinant and GS I-A<sub>4</sub>, with the cluster forms of Gal $\alpha$ 1 $\rightarrow$ 4Gal (**E**) and Gal $\alpha$ 1 $\rightarrow$ 3Gal (**B**) determinants. The binding property of GS I-A<sub>4</sub> has potential to serve as a probe not only to detect **Tn**, **F** and **A** glycotopes but also **B** and **E** clusters. However, it is a poor reagent for detecting Gal $\beta$ 1 $\rightarrow$ 3GalNAc $\alpha$ 1 $\rightarrow$ Ser/Thr (**T $\alpha$** ), and GalNAc $\beta$ 1 $\rightarrow$ 3/4Gal (**P/S**) residues. Summarizing previous data (Wood *et al.*, 1979; Wu *et al.*, 1996; 1997a) and the present results, it is concluded that each of the GalNAc specific lectins has its own binding characteristic. GS I-A<sub>4</sub> has been shown to be toxic to the human colon cancer cell lines (Chen *et al.*, 1994). In this case, **Tn** clusters and/or Forssman glycotopes may be involved.

## Materials and methods

### The lectin

*Bandeiraea (Griffonia) simplicifolia* lectin-I isolectin A<sub>4</sub> (GS I-A<sub>4</sub>) (L-1509) was purchased from Sigma Chemical Co., St Louis, MO.

### Glycoproteins

Ovine and porcine salivary glycoproteins (OSM-major and PSM), and bovine submandibular glycoprotein (BSM-major) were prepared by the method of Tettamanti and Pigman (1968). Hamster submaxillary glycoprotein was prepared by the methods of Downs and Herp (1977). For desialylation, a sample of glycoprotein in 0.01 N HCl was hydrolyzed at 80°C for 90 min and dialyzed against distilled H<sub>2</sub>O (Wu *et al.*, 1994c).

Native ASG-**Tn**, an armadillo salivary glycoprotein containing only **Tn** (GalNAc $\alpha$ 1 $\rightarrow$ Ser/Thr) as carbohydrate side chains, was isolated from the 0.01 M PBS pH 6.8 gland extract after removal of ASG-A, which is one of the sialic acid containing glycoproteins in armadillo glands (Wu and Pigman, 1977; Wu *et al.*, 1994a, 1995b).

The blood group active glycoproteins from human ovarian cyst fluids were purified by digestion with pepsin and precipitation with ethanol; the dried ethanol precipitates were extracted with 90% phenol, the insoluble fraction being named according to its blood group glycoprotein (e.g., Cyst Beach phenol insoluble). The supernatant was fractionally precipitated by addition of 50% ethanol in 90% phenol to the indicated concentrations. The designation 10 or 20% (ppt.) denotes a fraction precipitated from phenol at an ethanol concentration of 10 or 20%; 2 $\times$  signifies that a second phenol extraction and ethanol precipitation were carried out (e.g., Cyst MSS 10% 2 $\times$ ). The P-1 fraction represents the nondialyzable portion of the blood group substances after mild hydrolysis at pH 1.5–2.0 and 100°C for 2 h which removed most of the L-fucopyranosyl end groups, as well as some blood group A and B active oligosaccharide side-chains (Lloyd and Kabat, 1968; Wu *et al.*, 1992a, 1995b).

Human blood group P<sub>1</sub>-active glycoprotein, isolated from sheep hydatid cyst (Morgan and Watkins, 1964; Cory *et al.*, 1974), was kindly provided by Dr. W.M. Watkins, University of London, Royal Postgraduate Medical School Hammersmith Hospital, London.

Glycophorin A was prepared from the membranes of outdated human blood group O erythrocytes by phenol/saline extraction and was purified by gel filtration in the presence of SDS (Lisowska *et al.*, 1987). Asialo-glycoprotein was prepared by mild acid hydrolysis (Wu and Pigman, 1977; Wu *et al.*, 1994b,c). The Tn-type glycophorin (Tn-glycophorin) was obtained by removing galactose residues from asialo-glycophorin by periodate oxidation and mild acid hydrolysis (Smith degradation) (Duk *et al.*, 1994).

### Sugar inhibitors

Monosaccharides, their derivatives and oligosaccharides were purchased from Sigma Chemical Company (St. Louis, MO). GalNAc $\alpha$ 1 $\rightarrow$ 3 [LFuc $\alpha$ 1 $\rightarrow$ 2]Gal (**Ah**), and GalNAc $\alpha$ 1 $\rightarrow$ 3GalNAc $\beta$ 1 $\rightarrow$ 3Gal $\alpha$ 1 $\rightarrow$ 4Gal $\beta$ 1 $\rightarrow$ 4Glc (**Fp**) were from Accurate Chemical & Scientific Corp., Westburg, NY.

**Tn** glycopeptide preparation: The OSM **Tn** glycopeptides were prepared as described by the method of Wu *et al.* (1997b).

### The microtiter plate lectin-enzyme binding assay

Biotinylation of lectin was prepared according to the method described by Duk (1994) and Lisowska (1996). The assay was performed according to the procedures previously described (Duk *et al.*, 1994; Lisowska *et al.*, 1996; Chen *et al.*, 1998). The volume of each reagent applied to the plate was 50  $\mu$ l/well, and all incubations, except for coating, were performed at 20°C. The reagents, if not indicated otherwise, were diluted with TBS containing 0.05% Tween 20 (TBS-T). The TBS buffer or 0.15 M NaCl containing 0.05% Tween 20 was used for washing the plate between incubations.

All experiments were done in duplicate or triplicate and results are mean values. The standard deviation did not exceed 10% and in most experiments was less than 5% of the mean value. The control wells, where coating or addition of biotinylated lectin was omitted, gave low absorbance values (below 0.1, read against the well filled with buffer) and were used as blank. It showed that blocking the wells before lectin addition was not necessary, when Tween 20 was used in TBS.

## Acknowledgments

We are thankful for the reviewers' suggestions, especially the parameters used to evaluate binding property of lectin-carbohydrate interaction by ELLSA. This work was supported by Grants from the Chang-Gung Medical Research Project (CMRP No. 676), Kwei-san, Tao-yuan, Taiwan, the National Science Council (NSC 87-2314-B-182-053 and 87-2316-B-182-005) Taipei, Taiwan. This work was also supported by Grants 5RO1 A127508-03 and 2RO1 AI/GM19042-07 from the National Institutes of Health and DMB890-1840 from the National Science Foundation, USA.

## Abbreviations

Lectins: *Bandeiraea (Griffonia) simplicifolia* lectin-I isolectin A<sub>4</sub>(GS I-A<sub>4</sub>); CFT, Codium fragile subspecies tomentosoides. Monosaccharides: Gal, D-galactopyranose; Glc, D-glucopyranose;



LFuc, L-fucopyranose; dFuc, D-fucopyranose; GalNAc, 2-acetamido-2-deoxy-D-galactopyranose; GlcNAc, 2-acetamido-2-deoxy-D-glucopyranose; NeuNAc/Neu5Ac, N-acetylneuraminic acid; NeuNGc, N-glycolylneuraminic acid; Fru, D-fructofuranose. Glycoprotein (GP): OSM-major, major fraction of ovine submandibular glycoprotein; BSM-major, major fraction of bovine submandibular glycoprotein; HSL, hamster sublingual glycoprotein; PSM, porcine submandibular gp-major; ASG, armadillo submandibular gp.

The carbohydrate structural units (lectin determinants) used to characterize binding properties of applied lectins (Wu and Sugii, 1988, 1991; Wu *et al.*, 1997a) are: **F**, Forssman specific disaccharide (GalNAc $\alpha$ 1 $\rightarrow$ 3GalNAc); **Fp** (Forssman pentasaccharide, GalNAc $\alpha$ 1 $\rightarrow$ 3GalNAc $\beta$ 1 $\rightarrow$ 3Gal $\alpha$ 1 $\rightarrow$ 4Gal $\beta$ 1 $\rightarrow$ 4Glc); **A**, human blood group A specific disaccharide (GalNAc $\alpha$ 1 $\rightarrow$ 3Gal); **A<sub>n</sub>**, GalNAc $\alpha$ 1 $\rightarrow$ 3 [LFuc $\alpha$ 1 $\rightarrow$ 2]Gal, blood group A specific disaccharide containing cryptic H determinant; **Tn**, GalNAc $\alpha$ 1 $\rightarrow$ Ser/Thr; **I**, human blood type I precursor sequence (Gal $\beta$ 1 $\rightarrow$ 3GlcNAc); **II**, human blood type II precursor sequence (Gal $\beta$ 1 $\rightarrow$ 4GlcNAc); **L**, Gal $\beta$ 1 $\rightarrow$ 4Glc; **T**, Gal $\beta$ 1 $\rightarrow$ 3GalNAc, **T $\alpha$** , Gal $\beta$ 1 $\rightarrow$ 3GalNAc $\alpha$ 1 $\rightarrow$  Ser/Thr, the mucin type sugar sequence on the human erythrocyte membrane; **B**, blood group B specific disaccharide (Gal $\alpha$ 1 $\rightarrow$ 3Gal); **E**, galabiose (Gal $\alpha$ 1 $\rightarrow$ 4Gal) sequence, a receptor of the uropathogenic E.coli ligand; ELLSA, enzyme linked lectin-sorbent assay.

## References

- Bock, K., Karlsson, K.A., Strömberg, N. and Teneberg, S. (1988) Interaction of viruses, bacteria and bacterial toxins with host cell surface glycolipids. Aspects on receptor identification and dissection of binding epitopes. In Wu, A.M. (ed.), *The Molecular Immunology of Complex Carbohydrates*. Plenum Press, New York, *Adv. Exp. Med. Biol.*, **228**, 153–186.
- Cartron, J.P., Andreu, G., Cartron, J., Bird, G.W.G., Salmon, C. and Gerbal, A. (1978) Demonstration of T-transferase deficiency in Tn-polyagglutinable blood samples. *Eur. J. Biochem.*, **92**, 111–119.
- Chen, Y.F., Boland, C.R., Kraus, E.R. and Goldstein, I.J. (1994) The lectin *Griffonia simplicifolia* I-A<sub>4</sub> (GS I-A<sub>4</sub>) specifically recognizes terminal  $\alpha$ -linked N-acetylgalactosaminyl groups and is cytotoxic to the human colon cancer cell lines LS174t and SW1116. *Int. J. Cancer*, **57**, 561–567.
- Chen, C.P., Song, S.C., Gilboa-Garber, N., Chang, K.S.S. and Wu, A.M. (1998) Studies on the binding site of the galactose-specific agglutinin PA-IL from *Pseudomonas aeruginosa*. *Glycobiology*, **8**, 7–16.
- Cory, H.T., Yates, A.D., Donald, A.S.R., Watkins, W.M. and Morgan, W.T.J. (1974) The nature of the human blood group P<sub>1</sub> determinant. *Biochem. Biophys. Res. Commun.*, **61**, 1289–1296.
- Dahr, W., Uhlenbruck, G. and Bird, G.W.G. (1974) Cryptic A-like receptor sites in human erythrocyte glycoproteins: proposed nature of Tn-antigen. *Vox Sang.*, **27**, 29–42.
- Downs, F. and Herp, A. (1977) Chemical studies on a hamster sublingual glycoprotein. *Int. J. Peptide Protein Res.*, **10**, 229–234.
- Duk, M., Lisowska, E., Wu, J.H. and Wu, A.M. (1994) The biotin/avidin-mediated microtiter plate lectin assay with the use of chemically modified glycoprotein ligand. *Anal. Biochem.*, **221**, 266–272.
- Hakomori, S. (1984) Philip Levine award lecture: blood group glycolipid antigens and their modifications as human cancer antigens. *Am. J. Clin. Pathol.*, **82**, 635–648.
- Hakomori, S. (1989) Aberrant glycosylation in tumors and tumor-associated carbohydrate antigens. *Adv. Cancer Res.*, **52**, 257–331.
- Hakomori, S. and Kannagi, R. (1986) Carbohydrate antigens in higher animals. In Weir, D.M., Herzenberg, L.A., Blackwell, C.C. and Herzenberg, L.A. (eds.), *Handbook of Experimental Immunology*. Vol. 1. Blackwell Scientific, Oxford, pp. 9.1–9.39.
- Hakomori, S. and Kannagi, R. (1986) Carbohydrate antigens in higher animals. In Weir, D.M., Herzenberg, L.A., Blackwell, C.C. and Herzenberg, L.A. (eds.), *Handbook of Experimental Immunology*. Vol. 1. Blackwell Scientific Publications, Oxford, pp. 9.1–9.39.
- Hakomori, S., Wang, S.-M., Young, W.-W. (1977) Isoantigenic expression of Forssman glycolipid in human gastric and colonic mucosa: its possible identity with "A-like antigen" in human cancer. *Proc. Natl Acad. Sci. USA*, **74**, 3023–3027.
- Hayes, C.E. and Goldstein, I.J. (1974) An  $\alpha$ -D-galactosyl-binding lectin from *Bandeiraea simplicifolia* seeds. *J. Biol. Chem.*, **249**, 1904–1914.
- Hirohashi, S., Clausen, H., Yamada, T., Shimossato, Y. and Hakomori, S.I. (1985) Blood group A cross-reacting epitope defined by monoclonal antibodies NCC-LU-35 and -81 expressed in cancer of blood group O or B individuals: its identification as Tn antigen. *Proc. Natl Acad. Sci. USA*, **82**, 7039–7043.
- Itzkowitz, S.H., Yuan, M., Montgomery, C.K., Kjeldsen, T., Takahashi, H.K., Bigbee, W.L. and Kim, Y.S. (1989) Expression of Tn, sialosyl-Tn and T antigens in human colon cancer. *Cancer Res.*, **49**, 197–204.
- Itzkowitz, S.H., Bloom, E.J., Kokal, W.A., Modin, G., Hakomori, S.I. and Kim, Y.S. (1990) Sialyl-Tn. A novel mucin antigen associated with prognosis in colorectal cancer patients. *Cancer*, **66**, 1960–1966.
- Karlsson, K.A. (1989) Animal glycosphingolipids as membrane attachment sites for bacteria. *Annu. Rev. Biochem.*, **58**, 309–350.
- Kjeldsen, T., Clausen, H., Hirohashi, S., Ogawa, Y., Iijama, H. and Hakomori, S.I. (1988) Preparation and characterization of monoclonal antibodies directed to the tumor associated O-linked sialosyl 2 $\rightarrow$ 6 $\alpha$ -N-acetylgalactosaminyl (sialosyl-Tn) epitope. *Cancer Res.*, **48**, 2214–2220.
- Lisowska, E. (1988) Antigenic properties of human erythrocyte glycoporphins. In Wu, A.M. (ed.), *The Molecular Immunology of Complex Carbohydrates*. Plenum Press, New York, pp. 265–316.
- Lisowska, E., Messeter, L., Duk, M., Czerwinski, M. and Lundblad, A. (1987) A monoclonal anti-glycophorin A antibody recognizing the blood group M determinant: Studies on the subspecificity. *Mol. Immunol.*, **24**, 605–613.
- Lisowska, E., Duk, M. and Wu, A.M. (1996) Preparation of biotinylated lectins and application in microtiter plate assays and Western blotting. *BioMethods*, **7**, 115–129.
- Lloyd, K.O. and Kabat, E.A. (1968) Immunochemical studies on blood groups. XLI. Proposed structures for the carbohydrate portion of blood group A, B, H, Lewis<sup>a</sup> and Lewis<sup>b</sup> substances. *Proc. Natl Acad. Sci. USA*, **61**, 1470–1477.
- Mäkelä, O. (1957) Studies in hemagglutinins of Leguminosae seeds. *Ann. Med. Exp. Biol. Fenn. Suppl.*, **35**, 1–156.
- Morgan, W.T. and Watkins, W.M. (1964) Blood-group P<sub>1</sub> substances. *Proc. 9th Congr. Int. Soc. Blood Transf., Mexico*, **1962**, pp. 225–229.
- Murphy, L.A. and Goldstein, I.J. (1977) Five  $\alpha$ -D-galactopyranosyl-binding isolectins from *Bandeiraea simplicifolia*. *J. Biol. Chem.*, **252**, 4739–4742.
- Ono, K., Hattori, H., Uemura, K.I., Nakayama, J., Ota, H. and Katsuyama, T. (1994) Expression of Forssman antigen in human large intestine. *J. Histochem. Cytochem.*, **42**, 659–665.
- Piller, V., Piller, F. and Cartron, J.-P. (1990) Comparison of the carbohydrate-binding specificities of seven N-acetyl-D-galactosamine-recognizing lectins. *Eur. J. Biochem.*, **191**, 461–466.
- Springer, G.F. (1984) T and Tn, general carcinoma autoantigens. *Science*, **24**, 1189–1260.
- Taniguchi, N., Yokosawa, N., Narita, M., Mitsuyama, T., (1981) Makita, A. Expression of Forssman antigen synthesis and degradation in human lung cancer. *J. Natl Cancer Inst.*, **67**, 577–583.
- Tettamanti, G. and Pigman, W. (1968) Purification and characterization of bovine and ovine submaxillary mucins. *Arch. Biochem. Biophys.*, **124**, 41–50.
- Wood, C., Kabat, E.A., Murphy, L.A. and Goldstein, I.J. (1979) Immunochemical studies of the combining sites of the two isolectins, A<sub>4</sub> and B<sub>4</sub>, isolated from *Bandeiraea simplicifolia*. *Arch. Biochem. Biophys.*, **198**, 1–11.
- Wu, A.M. and Pigman, W. (1977) Preparation and characterization of armadillo submandibular glycoproteins. *Biochem. J.*, **161**, 37–47.
- Wu, A.M. and Sugii, S. (1988) Differential binding properties of GalNAc and/or Gal specific lectins. *The Molecular Immunology of Complex Carbohydrates. Adv. Exp. Med. Biol.*, **228**, 205–263.
- Wu, A.M. and Sugii, S. (1991) Coding and classification of GalNAc and/or Gal specific lectins. *Carbohydr. Res.*, **213**, 127–143.
- Wu, A.M., Lin, S.R., Chin, L.K., Chow, L.P. and Lin, J.Y. (1992a) Defining the carbohydrate specificities of *Abrus precatorius* agglutinin as T (Gal $\beta$ 1 $\rightarrow$ 3GalNAc) > I/II (Gal $\beta$ 1 $\rightarrow$ 3/4GlcNAc). *J. Biol. Chem.*, **267**, 19130–19139.
- Wu, A.M., Chin, L.K., Franz, H., Pfüller, U. and Herp, A. (1992b) Carbohydrate specificity of the receptor sites of mistletoe toxic lectin-I. *Biochim. Biophys. Acta*, **1117**, 232–234.

- Wu,A.M., Wu,J.H. and Shen,F.S. (1994a) Interaction of a novel Tn (GalNAc $\alpha$ 1 $\rightarrow$ Ser/Thr) glycoprotein with Gal, GalNAc and GlcNAc specific lectins. *Biochem. Biophys. Res. Commun.*, **198**, 251–256.
- Wu,A.M., Shen,F.S., Herp,A. and Wu,J.H. (1994b) Interaction of hamster submaxillary sialyl-Tn and Tn glycoproteins with Gal, GalNAc and GlcNAc specific lectins. *Mol. Immunol.*, **31**, 485–490.
- Wu,A.M., Csako,G. and Herp,A. (1994c) Structure, biosynthesis and function of salivary mucins. *Mol. Cell. Biochem.*, **137**, 39–56.
- Wu,A.M., Song,S.C., Wu,J.H., Pfüller,U., Chow,L.P. and Lin,J.Y. (1995a) A sheep hydatid cyst glycoprotein as receptors for three toxic lectins, as well as *Abrus precatorius* and *Ricinus communis* agglutinins. *Biochim. Biophys. Acta*, **1243**, 124–128.
- Wu,A.M., Song,S.C., Hwang,P.Y., Wu,J.H. and Chang,K.S.S. (1995b) Binding studies on the combining site of a GalNAc $\alpha$ 1 $\rightarrow$ -specific lectin with Thomsen-Friedenreich activity prepared from green marine algae *Codium fragile* subspecies *tomentosoides*. *Eur. J. Biochem.*, **233**,145–151.
- Wu,A.M., Wu,J.H., Song,S.C. and Kabat,E.A. (1996) *Bandeiraea (Griffonia) simplicifolia* lectin-I, isolectin A4, reacting with Tn (GalNAc $\alpha$ 1 $\rightarrow$ Ser/Thr) or galabiose (Gal $\alpha$ 1 $\rightarrow$ 4Gal) containing ligands. *FEBS Lett.*, **398**, 183–186.
- Wu,A.M., Song,S.C., Sugii,S. and Herp,A. (1997a) Differential binding properties of Gal/GalNAc specific lectins available for characterization of glycoreceptors. *Ind. J. Biochem. Biophys.*, **34**, 61–71.
- Wu,A.M., Song,S.C., Chang,S.C., Wu,J.H., Chang,K.S.S. and Kabat,E.A. (1997b) Further characterization of the binding properties of a GalNAc specific lectin from *Codium fragile* subspecies *tomentosoids*. *Glycobiology*, **7**, 1061–1066.
- Yoda,Y., Ishibashi,T. and Makita,A. (1980) Isolation, characterization and biosynthesis of Forssman antigen in human lung and lung carcinoma. *J. Biochem.*, **88**, 1887–1890.
